# Supplementary figures and images for: Chimonanthus salicifolius attenuated vascular remodeling by alleviating endoplasmic reticulum stress in spontaneously hypertensive rats
Source: Royal Society of Chemistry journal article supplement (doi:10.1039/d1fo04381a), 2022-01-01

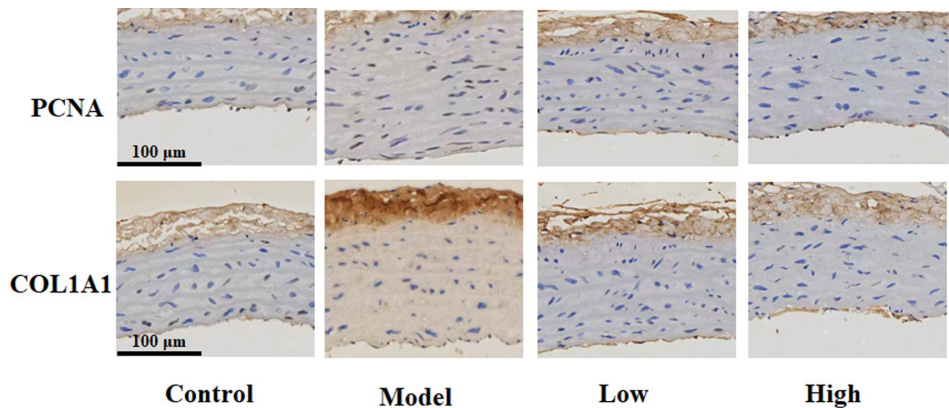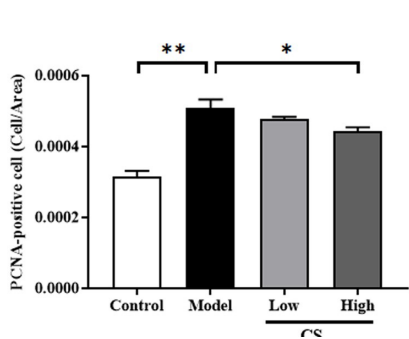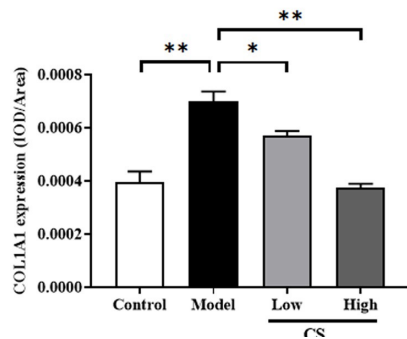

Supplement: d1fo04381a2.pdf [file d1fo04381a2.pdf]
